# Supplementary material for: Exploratory investigation of region level risk factors of Ebola Virus Disease in West Africa
Source: PeerJ. 2018 Nov 19;6:e5888. doi: 10.7717/peerj.5888 (PMC6250096; doi:10.7717/peerj.5888)
Supplement: Supplemental Information 3 [file peerj-06-5888-s003.xlsx]

## Sheet: Data
Region Number	iso_code	country	year	GDLCODE	Region	CaseCount	iwi	edyr	edyr_fem	edyr_male	urban	wrk_agri	wrk_lnagr	wrk_unagr	tv	phone	electr	small_house	large_house	qual_floor	bad_floor	tap_water	bad_water	flush_toilet	bad_toilet	Density	age09	age1019	age2029	age3039	age4049	age5059	age6069	age7079	age8089	age90hi	N	Nhh	Population	Risk (Casses/100,000)
1	SLE	Sierra Leone	2013	SLEr109	Bo	314	27.6	3.6	2.6	4.7	28.4	58.7	33.4	7.9	14.9	56.9	15.4	14.5	58.3	2.6	54	0.7	27.4	2.6	40.2	107.592	35.7	22	13	11.2	7.5	5	3.5	1.6	0.4	0.1	6326	1043	561524	56
1	GIN	Guinea	2012	GINr101	Boke	80	36.3	3.4	2.2	4.7	34.2	63.7	29.8	6.4	25.3	68.1	21.1	8.5	70.7	4.2	50.4	25.8	29.7	21.6	64.1	34.6773	31.2	24.5	12.7	8.7	6.9	8.1	4.5	2.5	0.8	0.1	4931	841	1081445	7
2	SLE	Sierra Leone	2013	SLEr101	Bombali	1049	24.6	3.5	2.5	4.6	28.3	66.9	23.7	9.4	7.9	56.2	9.7	11.2	59.1	2.5	62.3	1	48.3	4.4	47.9	54.3919	31.3	26.2	12.4	10.4	7.7	5.2	3.9	2.4	0.5	0.1	6222	1028	434319	242
3	LBR	Liberia	2013	LBRr101	Bomi	139	22.4	4.8	3	6.7	22.6	45.7	44.9	9.4	5.6	55.8	0.4	25.2	43.3	2.7	56.1	0	20.2	3.1	73.2	43.5399	34.3	23.1	13.1	10.3	7.2	5.9	3.4	1.7	0.7	0.2	1393	288	84119	165
4	LBR	Liberia	2013	LBRr102	Bong	150	19.5	3.3	1.8	4.9	38.9	75.3	19.8	4.9	2.4	56.8	0	26.4	42.8	1.2	73.3	0.2	43.6	2.8	78.1	38.0947	34.9	19.1	12.3	11.8	8.2	6.9	4.1	2.1	0.7	0	5195	1151	333481	45
5	SLE	Sierra Leone	2013	SLEr110	Bonthe	5	18.8	2.3	1.8	2.8	16.6	79.7	17.8	2.6	3.2	50.3	0.5	10.1	64.6	0.8	67.7	0.3	68.7	0.4	81.7	40.6127	32.6	23.4	14.2	10.7	7.4	5.8	3.7	1.7	0.5	0.1	3043	533	140845	4
6	GIN	Guinea	2012	GINr102	Conakry	568	72.6	7.3	5.7	9	100	3.7	73.2	23.1	85.2	97.6	94	12.7	56.8	33	5.1	84.7	0.9	62.5	8.9	3706.36	25.3	26.4	19.8	11	6.8	5.7	3.5	1.1	0.4	0.1	8146	1251	1667864	34
7	GIN	Guinea	2012	GINr103	Faranah	154	26.3	1.8	0.8	3.1	19.4	69.1	27.9	3	9.4	48.5	8.2	7.3	70.3	1.3	61.9	3.2	22.9	4.2	74.9	26.4954	35.2	25.3	11	9	7.9	5.9	3.9	1.3	0.4	0.1	4136	565	942733	16
8	LBR	Liberia	2013	LBRr103	Gbarpolu	16	18.2	3.8	2.1	5.5	20.5	57.8	33.2	9	1.9	38	2	23.8	47.9	1	79.9	0	40.1	2.7	71.6	8.37818	35.1	19.5	13.3	12.2	8.5	5	4	1.9	0.4	0	1047	218	83388	19
9	LBR	Liberia	2013	LBRr104	Grand Bassa	54	22.7	3.8	2.2	5.2	35.2	50.3	39.6	10.1	10.7	54.2	3.4	35.8	30.6	4.3	61.9	0.5	53.1	10.5	68.6	28.3713	32.5	20.8	11.9	11.3	9.2	7.8	3.6	1.9	0.6	0.4	2566	606	221693	24
10	LBR	Liberia	2013	LBRr105	Grand Cape Mount	94	21.3	3.3	1.6	4.9	6.2	41.9	52.8	5.3	3.7	51.1	3.2	13.4	58.4	0.8	68.1	0	36.8	1	80.5	26.5794	37.8	18.4	12	12.6	8.4	5.4	3.5	1.5	0.3	0.2	2266	429	127076	74
11	LBR	Liberia	2013	LBRr106	Grand Gedeh	3	23.9	5.3	3.8	6.8	46.6	48.1	41	10.9	5.5	50.9	2.2	16.6	58.8	2.6	69.5	0	13.6	1.9	64.1	11.5392	32.2	21	14	11.1	6.8	6.7	4.4	2.4	1.1	0.4	1040	202	125258	2
12	LBR	Liberia	2013	LBRr107	Grand Kru	4	18.2	4.8	2.4	7.2	4.6	42.4	47.8	9.8	2.8	48.3	0.5	12.6	58.2	4	81.4	0	65.8	0.5	78.3	14.8685	34.5	20.9	12.7	11	9.3	6.2	3.5	1.4	0.4	0	1314	212	57913	7
13	SLE	Sierra Leone	2013	SLEr106	Kailahun	565	18.1	3	2	4.3	16	67.5	28	4.5	2.5	37.8	0.9	17.1	55.8	1.1	81.5	2.9	41.1	0.5	64.9	106.121	34.6	18.5	10.9	13	7.8	6.1	4.6	2.7	1.2	0.5	4948	945	409520	138
14	SLE	Sierra Leone	2013	SLEr102	Kambia	253	22.1	1.9	1.1	3	12.2	84	10.5	5.5	6.1	55.9	0.6	4.5	77	0.9	77	0.1	79.1	0.5	46.7	100.954	35.9	23	10.5	10	8.8	4.9	3.7	2.1	0.9	0.1	3496	490	313765	81
15	GIN	Guinea	2012	GINr104	Kankan	235	31	1.5	0.7	2.4	13.7	76.4	20.6	3	15.6	63.1	9.4	6.1	74.3	1.6	66.4	8	19.6	1.9	71.3	27.5324	36.5	23.8	12	9.4	7	5.6	3.6	1.5	0.5	0.1	6434	954	1986329	12
16	SLE	Sierra Leone	2013	SLEr107	Kenema	503	27.7	3.4	2.4	4.5	38.8	62.1	33.3	4.6	12.9	59.4	16.1	14.7	58.2	3.9	59.5	3	22.8	2.6	43.5	90.092	31.7	21.8	13.1	11.8	7.9	5.8	5	2.1	0.5	0.3	7998	1409	545327	92
17	GIN	Guinea	2012	GINr105	Kindia	924	34.1	2.7	1.7	3.9	23.1	58.1	36.8	5	25.6	64.3	24.7	9.9	73.1	7.4	47.3	11.1	46.5	17.5	58	54.0015	34.2	23.2	12.5	9.6	6.6	6	4.4	2.5	0.7	0.2	6585	1038	1559185	59
18	SLE	Sierra Leone	2013	SLEr103	Koinadugu	109	16.2	1.6	1	2.4	8.3	78	17	5	3.4	28.8	0.8	12.5	64.1	3.2	77.2	0.2	73.4	0.9	76.8	20.7154	36.4	21.5	12	10.1	7	6.2	4	2.2	0.7	0.1	3634	587	251091	43
19	SLE	Sierra Leone	2013	SLEr108	Kono	254	20.5	2.6	1.6	3.8	25.4	61.1	34	4.9	2.9	42.4	1.1	13.4	59.8	1.6	69.7	0.4	38.2	1.4	50.3	62.4584	35.8	23	12.1	10.6	7.9	4.8	3.7	1.7	0.3	0.1	4301	706	352328	72
20	GIN	Guinea	2012	GINr106	Labe	7	26.2	1.7	1.1	2.9	5.4	40.8	55.6	3.6	7.3	66.3	5.4	15.5	56.5	2.4	51.3	2	39.3	4.5	65.2	43.54	34	21.5	9.6	8.4	7.1	7.5	6.7	3.2	1.8	0.2	3995	727	995717	1
21	LBR	Liberia	2013	LBRr108	Lofa	332	20.9	3.9	2	5.9	30.9	74.5	15.6	9.9	0.7	43.3	0.9	8.8	70.9	0.9	73.2	0.2	26.9	2.9	66.2	27.7362	33.2	20.8	14.1	11.2	6.9	6.4	3.4	2.5	1.2	0.4	2592	513	276863	120
22	GIN	Guinea	2012	GINr107	Mamou	16	28.4	1.5	0.9	2.8	9	64.2	34.1	1.8	10.3	69.9	10.1	13.8	56.8	3.6	41.1	4.1	49.2	7.8	69	42.8791	33.4	21.7	9.3	8	8	8.3	5.7	3.7	1.4	0.3	3147	591	732117	2
23	LBR	Liberia	2013	LBRr109	Margibi	392	32.8	5.1	3.3	6.9	43	39.8	49.8	10.4	17.6	76.1	7.9	15.4	36.2	7.3	39.9	0.3	26.2	27.5	48.6	78.0093	32.4	24.3	13.7	10.5	9.2	5.1	2.7	1.4	0.6	0.1	3772	714	209923	187
24	LBR	Liberia	2013	LBRr110	Maryland	4	26.2	5.7	4	7.3	52.4	44.2	45.1	10.7	7.7	63.3	2	21.5	53.4	2.9	53.6	0.2	12.3	2	57.7	59.1807	33	25.7	14.3	10	7.3	4.9	2.9	1.5	0.2	0.1	1494	256	135938	3
25	LBR	Liberia	2013	LBRr111	Montserrado	1797	45.9	8.2	6.9	9.5	93.4	12.3	71.7	16	39	92.3	26.2	31.3	40.4	19.7	13	10.5	14.6	42	31.7	594.809	28.1	25.8	18.4	11.8	7.3	4.8	2.5	1	0.3	0.1	16459	3461	1118241	161
26	SLE	Sierra Leone	2013	SLEr111	Moyamba	209	18	2.3	1.5	3.3	5.7	83.8	12.4	3.8	2.2	47.7	0.7	10.1	68.3	0.7	79.4	0.3	66.9	1	70.6	36.5677	32.7	20.3	12	11.7	8	7.1	4.5	2.6	0.9	0.2	4117	727	252390	83
27	GIN	Guinea	2012	GINr108	Nzerekore	1351	28	2.9	1.5	4.5	14.9	72.1	22.3	5.6	8.1	57.3	4.9	6.4	73.7	2.7	48.7	2.1	17.1	3.4	62.2	44.1761	34.1	23.9	12.9	9.6	7.4	5.5	4.1	1.8	0.5	0.1	7661	1144	1663582	81
28	LBR	Liberia	2013	LBRr112	Nimba	116	25.9	5.4	4.2	6.7	61.9	56.4	38.3	5.3	2.9	62.4	0.7	12.8	66.6	0.8	51.7	0	18.5	4.7	70.8	39.9988	35.1	20.9	13.4	9.6	7.5	6.6	3.4	1.9	1.1	0.6	6420	1047	462026	25
29	SLE	Sierra Leone	2013	SLEr104	Port Loko	1485	22.4	2.9	2	4.2	14.1	66.5	28.1	5.4	4.2	62.1	2	10.7	65.3	2	65.8	0.9	60	0.3	59.7	87.6013	35.5	21.8	12.8	10.5	7.8	5.1	4	1.8	0.6	0.1	8883	1363	500992	296
30	SLE	Sierra Leone	2013	SLEr112	Pujehun	31	22.7	1.9	1.4	2.4	14.1	58.4	37.1	4.5	2.3	62.2	0.9	15.1	56.3	1.7	70.9	0.6	26.1	1	57.7	61.4836	37.9	18	10.9	11.7	7.3	6	4.9	2.6	0.6	0.2	3158	589	252390	12
31	LBR	Liberia	2013	LBRr113	Rivercess	24	15.3	3.5	1.6	5.3	4.4	57.9	36.6	5.5	2.2	41	2.8	19.3	55.7	0.8	92.4	0	75.9	0.1	89.6	12.8521	37.2	19.8	12.9	11.2	7.8	5.9	3	1.5	0.3	0.5	805	157	71509	34
32	LBR	Liberia	2013	LBRr114	River Gee	8	21.9	4.7	3	6.2	23.9	48.3	43.6	8	5	50.4	3.4	17.7	47.9	0.4	74.5	0.3	39.5	1.4	60.9	13.0626	33.9	17.2	15.3	13.8	7.8	6.1	3.7	1.8	0.3	0	630	120	66789	12
33	LBR	Liberia	2013	LBRr115	Sinoe	18	17.5	4.6	2.6	6.4	17.5	49.7	41.2	9	4.5	34.7	5	23.9	46	1.6	84.7	0.4	49.1	1.3	79.5	10.4866	33.8	20.6	13	12	7.8	7.9	3	1	0.8	0.2	1225	232	102391	18
34	SLE	Sierra Leone	2013	SLEr105	Tonkolili	457	21.6	2.7	1.9	3.6	10.2	63.1	28.4	8.5	4.3	50.1	0.9	11.3	65.6	1.2	65.2	1.5	48.3	0.4	59.3	55.0224	35.2	21.9	13.2	11.6	7	4.8	3.7	2	0.6	0.1	7155	1116	385322	119
35	SLE	Sierra Leone	2013	SLEr113	Western	3449	50.7	7.3	6.1	8.5	91.9	10.5	72.7	16.8	55.7	91.5	58.2	29.6	39.7	23.4	10.3	24.7	9.3	21	20.1	3014.85	25.3	24.5	20.6	12.7	7.5	4.5	3.2	1.4	0.3	0.1	12007	2171	1679273	205

## Sheet: Info
Version 2.0	October 26, 2014
Data prepared by Jeroen Smits, Global Data Lab, Department of Economics, Radboud University, The Netherlands
Website:	www.globaldatalab.org
Contact:	j.smits@globaldatalab.org
Method	The data in this spreadsheet was prepared by aggregating representative individual/household survey data
	to the level of sub-national areas within the countries
Data sources:	Demographic and Health Surveys for Cote d'Ivoire 2011 , Guinea 2012, Liberia 2013, Mali 2013, Senegal 2011, and Sierra Leone 2013 (www.dhsprogram.com)
	UNICEF MICS Surveys for Gambia 2006 and Guinea Bissau 2006 (www.childinfo.org)
Included variables:
iso_code	Three digit ISO country code
country	Country name
Year	Survey year
gdlcode	Region code Global Data Lab
region	Sub-national region name
iwi	Mean International Wealth Index score of households in region1
edyr	Mean years of education of persons aged 20-49 in region
edyr_fem	Mean years of education of women aged 20-49 in region
edyr_male	Mean years of education of men aged 20-49 in region
urban	% of population living in urban area in region
wrk_agr	% married men aged 20-49 working in an agricultural occupation
wrk_lnagr	% married men aged 20-49 working in a lower non-agricultural occupation (manual, services, sales, clerical)
wrk_unagr	% married men aged 20-49 working in an upper non-agricultural occupation (professional, managerial, technical)
tv	% households with a TV in region
phone	% households with a (cel)phone in region
electr	% households with electricity in region
small_house	% households with none or one sleeping room in region
large_house	% households with three or more sleeping rooms in region
qual_floor	% households with high quality floor in region
bad_floor	% households with bad quality floor (earth, dung etc) in region
tap_water	% household with piped water in region
bad_water	% households with bad quality water supply in region
flush_toilet	% households with flush toilet in region
bad_toilet	% households with bad quality or no toilet in region
age09	Percentage of population aged 0-9 in region
age1019	Percentage of population aged 10-19 in region
age2029	Percentage of population aged 20-29 in region
age3039	Percentage of population aged 30-39 in region
age4049	Percentage of population aged 40-49 in region
age5059	Percentage of population aged 50-59 in region
age6069	Percentage of population aged 60-69 in region
age7079	Percentage of population aged 70-79 in region
age8089	Percentage of population aged 80-89 in region
age90hi	Percentage of population aged 90+ in region
N	Number of individual respondents in region
Nhh	Number of households in region
1 The International Wealth Index (IWI) is a comparable asset based wealth index for measuring households wealth in low and middle income countries
Iwi runs from 0 to 100, with score 0 for households who have none of the included assets and 100 for households who have all.
Smits, J & R. Steendijk (2014). "The International Wealth Index (IWI)". Social Indicators Research (online ).
http://link.springer.com/article/10.1007%2Fs11205-014-0683-x
Liberia and Sierra Leone Densities from humanitarian data exchange
gunea ewre calculated using data from http://www.geohive.com/cntry/guinea.aspx
case counts from http://maps.who.int/MapJournal/?appid=49cdc1357de84d78886792a13f7c5810&webmap=0b5dc51c0a734449be8ba82f2984c845
(as of march 4)
population
sierra leone (2004)- http://en.wikipedia.org/wiki/Sierra_Leone have 2004 cencus and 2010 estimtaes. I used the estimates
liberia: http://en.wikipedia.org/wiki/Counties_of_Liberia cites and has link to 2008 census
guinea- http://en.wikipedia.org/wiki/Guinea#Regions_and_prefectures cites 2014 census
Poverty
sierra leone: http://ohdr.nethope.opendata.arcgis.com/datasets/9525327c90fe4320bc3cd5ed33964a6d_6?uiTab=table
Liberia: http://ohdr.nethope.opendata.arcgis.com/datasets/2911e40572764b4885b588200ef2023f_4
Guinnea: https://ebolaresponse.maps.arcgis.com/home/item.html?id=7b6e2fbdb3244ebda3242e86caf46afb

## Sheet: Summary Statistics
	iwi	edyr	edyr_fem	edyr_male	urban	wrk_agri	wrk_lnagr	wrk_unagr	tv	phone	electr	small_house	large_house	qual_floor	bad_floor	tap_water	bad_water	flush_toilet	bad_toilet	Density	age09	age1019	age2029	age3039	age4049	age5059	age6069	age7079	age8089	age90hi	N	Nhh	Population
	36.3	3.4	2.2	4.7	34.2	63.7	29.8	6.4	25.3	68.1	21.1	8.5	70.7	4.2	50.4	25.8	29.7	21.6	64.1	34.6773	31.2	24.5	12.7	8.7	6.9	8.1	4.5	2.5	0.8	0.1	4931	841	1081445
	72.6	7.3	5.7	9	100	3.7	73.2	23.1	85.2	97.6	94	12.7	56.8	33	5.1	84.7	0.9	62.5	8.9	3706.36	25.3	26.4	19.8	11	6.8	5.7	3.5	1.1	0.4	0.1	8146	1251	1667864
	26.3	1.8	0.8	3.1	19.4	69.1	27.9	3	9.4	48.5	8.2	7.3	70.3	1.3	61.9	3.2	22.9	4.2	74.9	26.4954	35.2	25.3	11	9	7.9	5.9	3.9	1.3	0.4	0.1	4136	565	942733
	31	1.5	0.7	2.4	13.7	76.4	20.6	3	15.6	63.1	9.4	6.1	74.3	1.6	66.4	8	19.6	1.9	71.3	27.5324	36.5	23.8	12	9.4	7	5.6	3.6	1.5	0.5	0.1	6434	954	1986329
	34.1	2.7	1.7	3.9	23.1	58.1	36.8	5	25.6	64.3	24.7	9.9	73.1	7.4	47.3	11.1	46.5	17.5	58	54.0015	34.2	23.2	12.5	9.6	6.6	6	4.4	2.5	0.7	0.2	6585	1038	1559185
	26.2	1.7	1.1	2.9	5.4	40.8	55.6	3.6	7.3	66.3	5.4	15.5	56.5	2.4	51.3	2	39.3	4.5	65.2	43.54	34	21.5	9.6	8.4	7.1	7.5	6.7	3.2	1.8	0.2	3995	727	995717
	28.4	1.5	0.9	2.8	9	64.2	34.1	1.8	10.3	69.9	10.1	13.8	56.8	3.6	41.1	4.1	49.2	7.8	69	42.8791	33.4	21.7	9.3	8	8	8.3	5.7	3.7	1.4	0.3	3147	591	732117
	28	2.9	1.5	4.5	14.9	72.1	22.3	5.6	8.1	57.3	4.9	6.4	73.7	2.7	48.7	2.1	17.1	3.4	62.2	44.1761	34.1	23.9	12.9	9.6	7.4	5.5	4.1	1.8	0.5	0.1	7661	1144	1663582
	22.4	4.8	3	6.7	22.6	45.7	44.9	9.4	5.6	55.8	0.4	25.2	43.3	2.7	56.1	0	20.2	3.1	73.2	43.5399	34.3	23.1	13.1	10.3	7.2	5.9	3.4	1.7	0.7	0.2	1393	288	84119
	19.5	3.3	1.8	4.9	38.9	75.3	19.8	4.9	2.4	56.8	0	26.4	42.8	1.2	73.3	0.2	43.6	2.8	78.1	38.0947	34.9	19.1	12.3	11.8	8.2	6.9	4.1	2.1	0.7	0	5195	1151	333481
	18.2	3.8	2.1	5.5	20.5	57.8	33.2	9	1.9	38	2	23.8	47.9	1	79.9	0	40.1	2.7	71.6	8.37818	35.1	19.5	13.3	12.2	8.5	5	4	1.9	0.4	0	1047	218	83388
	22.7	3.8	2.2	5.2	35.2	50.3	39.6	10.1	10.7	54.2	3.4	35.8	30.6	4.3	61.9	0.5	53.1	10.5	68.6	28.3713	32.5	20.8	11.9	11.3	9.2	7.8	3.6	1.9	0.6	0.4	2566	606	221693
	21.3	3.3	1.6	4.9	6.2	41.9	52.8	5.3	3.7	51.1	3.2	13.4	58.4	0.8	68.1	0	36.8	1	80.5	26.5794	37.8	18.4	12	12.6	8.4	5.4	3.5	1.5	0.3	0.2	2266	429	127076
	23.9	5.3	3.8	6.8	46.6	48.1	41	10.9	5.5	50.9	2.2	16.6	58.8	2.6	69.5	0	13.6	1.9	64.1	11.5392	32.2	21	14	11.1	6.8	6.7	4.4	2.4	1.1	0.4	1040	202	125258
	18.2	4.8	2.4	7.2	4.6	42.4	47.8	9.8	2.8	48.3	0.5	12.6	58.2	4	81.4	0	65.8	0.5	78.3	14.8685	34.5	20.9	12.7	11	9.3	6.2	3.5	1.4	0.4	0	1314	212	57913
	20.9	3.9	2	5.9	30.9	74.5	15.6	9.9	0.7	43.3	0.9	8.8	70.9	0.9	73.2	0.2	26.9	2.9	66.2	27.7362	33.2	20.8	14.1	11.2	6.9	6.4	3.4	2.5	1.2	0.4	2592	513	276863
	32.8	5.1	3.3	6.9	43	39.8	49.8	10.4	17.6	76.1	7.9	15.4	36.2	7.3	39.9	0.3	26.2	27.5	48.6	78.0093	32.4	24.3	13.7	10.5	9.2	5.1	2.7	1.4	0.6	0.1	3772	714	209923
	26.2	5.7	4	7.3	52.4	44.2	45.1	10.7	7.7	63.3	2	21.5	53.4	2.9	53.6	0.2	12.3	2	57.7	59.1807	33	25.7	14.3	10	7.3	4.9	2.9	1.5	0.2	0.1	1494	256	135938
	45.9	8.2	6.9	9.5	93.4	12.3	71.7	16	39	92.3	26.2	31.3	40.4	19.7	13	10.5	14.6	42	31.7	594.809	28.1	25.8	18.4	11.8	7.3	4.8	2.5	1	0.3	0.1	16459	3461	1118241
	25.9	5.4	4.2	6.7	61.9	56.4	38.3	5.3	2.9	62.4	0.7	12.8	66.6	0.8	51.7	0	18.5	4.7	70.8	39.9988	35.1	20.9	13.4	9.6	7.5	6.6	3.4	1.9	1.1	0.6	6420	1047	462026
	15.3	3.5	1.6	5.3	4.4	57.9	36.6	5.5	2.2	41	2.8	19.3	55.7	0.8	92.4	0	75.9	0.1	89.6	12.8521	37.2	19.8	12.9	11.2	7.8	5.9	3	1.5	0.3	0.5	805	157	71509
	21.9	4.7	3	6.2	23.9	48.3	43.6	8	5	50.4	3.4	17.7	47.9	0.4	74.5	0.3	39.5	1.4	60.9	13.0626	33.9	17.2	15.3	13.8	7.8	6.1	3.7	1.8	0.3	0	630	120	66789
	17.5	4.6	2.6	6.4	17.5	49.7	41.2	9	4.5	34.7	5	23.9	46	1.6	84.7	0.4	49.1	1.3	79.5	10.4866	33.8	20.6	13	12	7.8	7.9	3	1	0.8	0.2	1225	232	102391
	27.6	3.6	2.6	4.7	28.4	58.7	33.4	7.9	14.9	56.9	15.4	14.5	58.3	2.6	54	0.7	27.4	2.6	40.2	107.592	35.7	22	13	11.2	7.5	5	3.5	1.6	0.4	0.1	6326	1043	561524
	24.6	3.5	2.5	4.6	28.3	66.9	23.7	9.4	7.9	56.2	9.7	11.2	59.1	2.5	62.3	1	48.3	4.4	47.9	54.3919	31.3	26.2	12.4	10.4	7.7	5.2	3.9	2.4	0.5	0.1	6222	1028	434319
	18.8	2.3	1.8	2.8	16.6	79.7	17.8	2.6	3.2	50.3	0.5	10.1	64.6	0.8	67.7	0.3	68.7	0.4	81.7	40.6127	32.6	23.4	14.2	10.7	7.4	5.8	3.7	1.7	0.5	0.1	3043	533	140845
	18.1	3	2	4.3	16	67.5	28	4.5	2.5	37.8	0.9	17.1	55.8	1.1	81.5	2.9	41.1	0.5	64.9	106.121	34.6	18.5	10.9	13	7.8	6.1	4.6	2.7	1.2	0.5	4948	945	409520
	22.1	1.9	1.1	3	12.2	84	10.5	5.5	6.1	55.9	0.6	4.5	77	0.9	77	0.1	79.1	0.5	46.7	100.954	35.9	23	10.5	10	8.8	4.9	3.7	2.1	0.9	0.1	3496	490	313765
	27.7	3.4	2.4	4.5	38.8	62.1	33.3	4.6	12.9	59.4	16.1	14.7	58.2	3.9	59.5	3	22.8	2.6	43.5	90.092	31.7	21.8	13.1	11.8	7.9	5.8	5	2.1	0.5	0.3	7998	1409	545327
	16.2	1.6	1	2.4	8.3	78	17	5	3.4	28.8	0.8	12.5	64.1	3.2	77.2	0.2	73.4	0.9	76.8	20.7154	36.4	21.5	12	10.1	7	6.2	4	2.2	0.7	0.1	3634	587	251091
	20.5	2.6	1.6	3.8	25.4	61.1	34	4.9	2.9	42.4	1.1	13.4	59.8	1.6	69.7	0.4	38.2	1.4	50.3	62.4584	35.8	23	12.1	10.6	7.9	4.8	3.7	1.7	0.3	0.1	4301	706	352328
	18	2.3	1.5	3.3	5.7	83.8	12.4	3.8	2.2	47.7	0.7	10.1	68.3	0.7	79.4	0.3	66.9	1	70.6	36.5677	32.7	20.3	12	11.7	8	7.1	4.5	2.6	0.9	0.2	4117	727	252390
	22.4	2.9	2	4.2	14.1	66.5	28.1	5.4	4.2	62.1	2	10.7	65.3	2	65.8	0.9	60	0.3	59.7	87.6013	35.5	21.8	12.8	10.5	7.8	5.1	4	1.8	0.6	0.1	8883	1363	500992
	22.7	1.9	1.4	2.4	14.1	58.4	37.1	4.5	2.3	62.2	0.9	15.1	56.3	1.7	70.9	0.6	26.1	1	57.7	61.4836	37.9	18	10.9	11.7	7.3	6	4.9	2.6	0.6	0.2	3158	589	252390
	21.6	2.7	1.9	3.6	10.2	63.1	28.4	8.5	4.3	50.1	0.9	11.3	65.6	1.2	65.2	1.5	48.3	0.4	59.3	55.0224	35.2	21.9	13.2	11.6	7	4.8	3.7	2	0.6	0.1	7155	1116	385322
	50.7	7.3	6.1	8.5	91.9	10.5	72.7	16.8	55.7	91.5	58.2	29.6	39.7	23.4	10.3	24.7	9.3	21	20.1	3014.85	25.3	24.5	20.6	12.7	7.5	4.5	3.2	1.4	0.3	0.1	12007	2171	1679273
	iwi	edyr	edyr_fem	edyr_male	urban	wrk_agri	wrk_lnagr	wrk_unagr	tv	phone	electr	small_house	large_house	qual_floor	bad_floor	tap_water	bad_water	flush_toilet	bad_toilet	Density	age09	age1019	age2029	age3039	age4049	age5059	age6069	age7079	age8089	age90hi	N	Nhh	Population
min	15.3	1.5	0.7	2.4	4.4	3.7	10.5	1.8	0.7	28.8	0	4.5	30.6	0.4	5.1	0	0.9	0.1	8.9	8.37818	25.3	17.2	9.3	8	6.6	4.5	2.5	1	0.2	0	630	120	57913
max	72.6	8.2	6.9	9.5	100	84	73.2	23.1	85.2	97.6	94	35.8	77	33	92.4	84.7	79.1	62.5	89.6	3706.36	37.9	26.4	20.6	13.8	9.3	8.3	6.7	3.7	1.8	0.6	16459	3461	1986329
mean	26.2917	3.66667	2.41667	5.02222	28.6583	56.4722	36.0472	7.475	11.7083	57.0833	9.61667	15.5417	57.8167	4.24444	60.7194	5.28333	38.0833	7.35556	61.4556	245.157	33.6806	22.0583	13.1083	10.8361	7.68056	5.98611	3.88611	1.94444	0.652778	0.180556	4681.69	817.333	560685
stnd dev	11.0087	1.68608	1.45298	1.90715	24.7477	19.134	15.8253	4.37025	16.9077	15.2843	18.2753	7.40673	11.5405	6.86479	20.0675	14.9296	20.5254	13.1182	17.2529	776.65	2.86574	2.4067	2.36551	1.31087	0.696038	1.0162	0.817366	0.598304	0.35656	0.150844	3346.58	630.121	551580
																																Total Pop:	20184666
